# Supplementary material
Source: Springer Nature journal article supplement (https://www.springermedizin.de/resource/supplementary/12889_2008_1364_MOESM5_ESM.pdf/9503048)

**Disability-Adjusted Life Years (DALYs)**

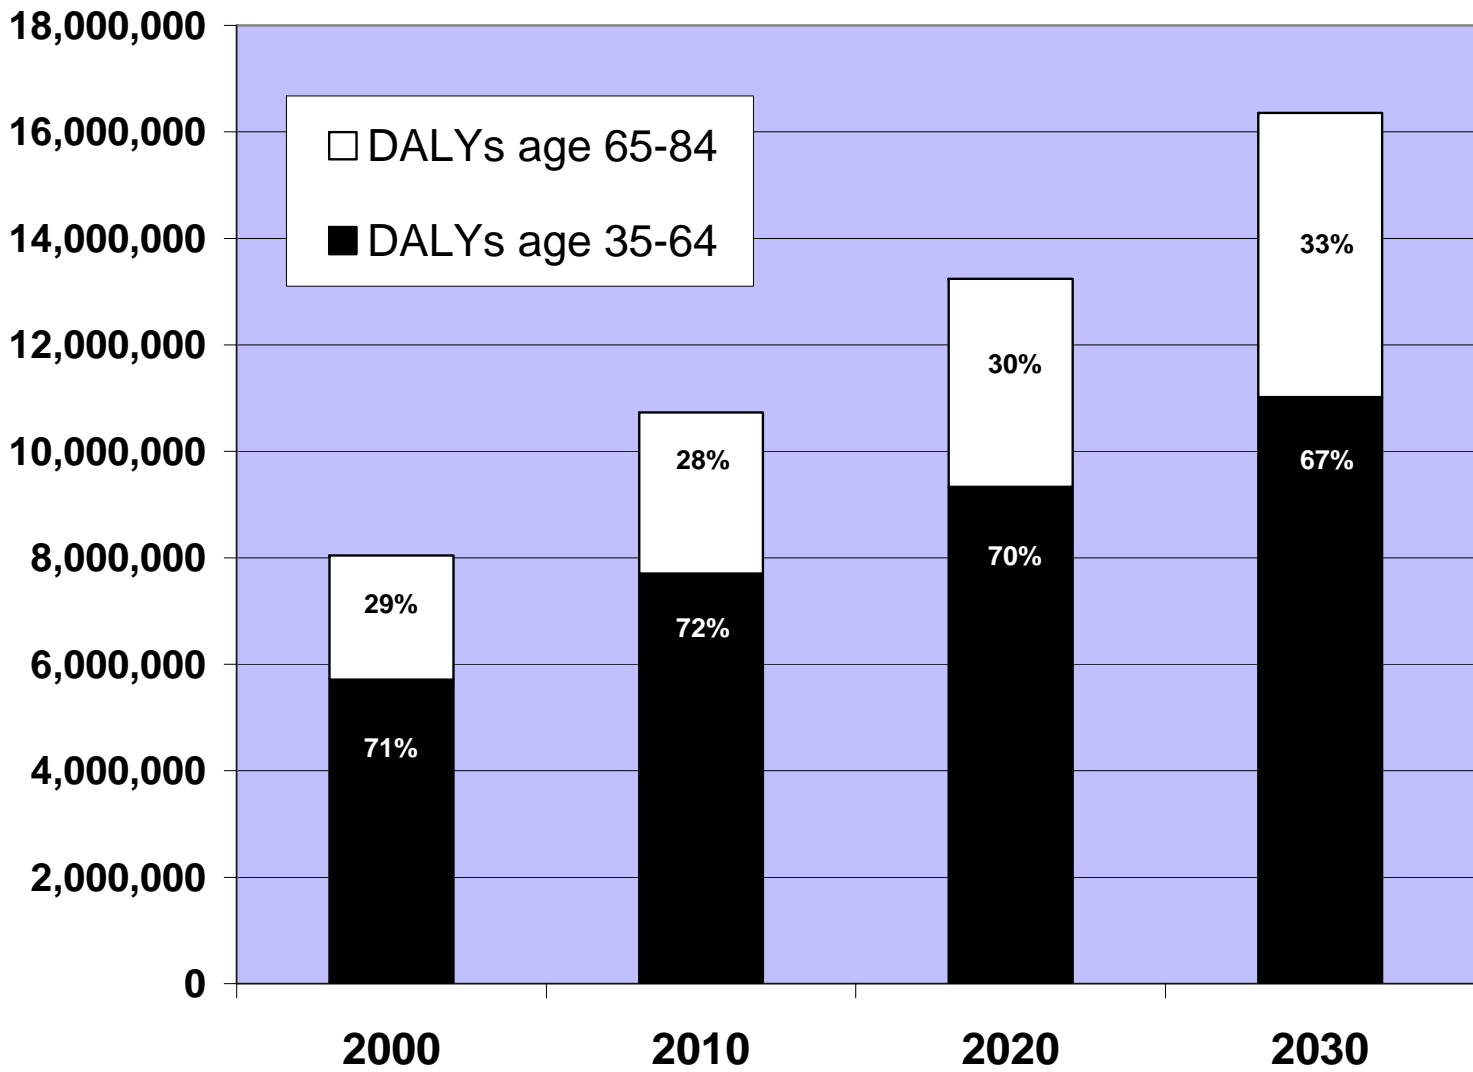

Supplement: MOESM5 [file 9503048]
